# Supplementary material for: Monoglyceride lipase gene knockout in mice leads to increased incidence of lung adenocarcinoma
Source: PubMed Central journal article supplement (PMC5833374; doi:10.1038/s41419-017-0188-z), 2018-01-18
Supplement: 41419_2017_188_MOESM1_ESM.pdf [file 41419_2017_188_MOESM1_ESM.pdf]

Supplementary Figure 1  
(legend)

**Supplementary Figure 1.** Schematic diagram of MGL knockout (cKO) targeting vector and strategy. A. The targeting vector was designed as shown at the top with LoxP sites flanking the exon 3 of MGL. The selection marker PGKneo was also inserted into the flanked region. The vector was used to transfect mouse embryonic stem (ES) cells. The subsequent cellular homologous recombination resulted in ES clones with MGL allele containing the LoxP sites and selection marker. Breeding of mouse containing the modified MGL allele with ROSA26-Flpe mouse then removed the PGKneo cassette. Following further breeding with Cre mice, MGL knockout allele (MGL<sup>+/-</sup>) was generated. MGL<sup>-/-</sup> mice were generated by crossing MGL<sup>+/-</sup> mice. Inbreeding among the MGL hemizygous mice generated mice with three different genotypes including the wild-type (MGL<sup>+/+</sup>), hemizygous (MGL<sup>+/-</sup>) and homozygous (MGL<sup>-/-</sup>)-deficient mice. B. Representative genotyping results of genomic DNA-PCR of animal tail tissues. PCR primers used in the reactions are described in the Materials and Methods. C. MGL protein expression in mice tissues as detected by western blot analysis using MGL-specific antibody. Ponceau S staining and  $\alpha$ -tubulin show protein loading of the membrane. D. Western blot analysis showing MGL protein expression in the indicated tissues of a wild-type (MGL<sup>+/+</sup>) mouse.

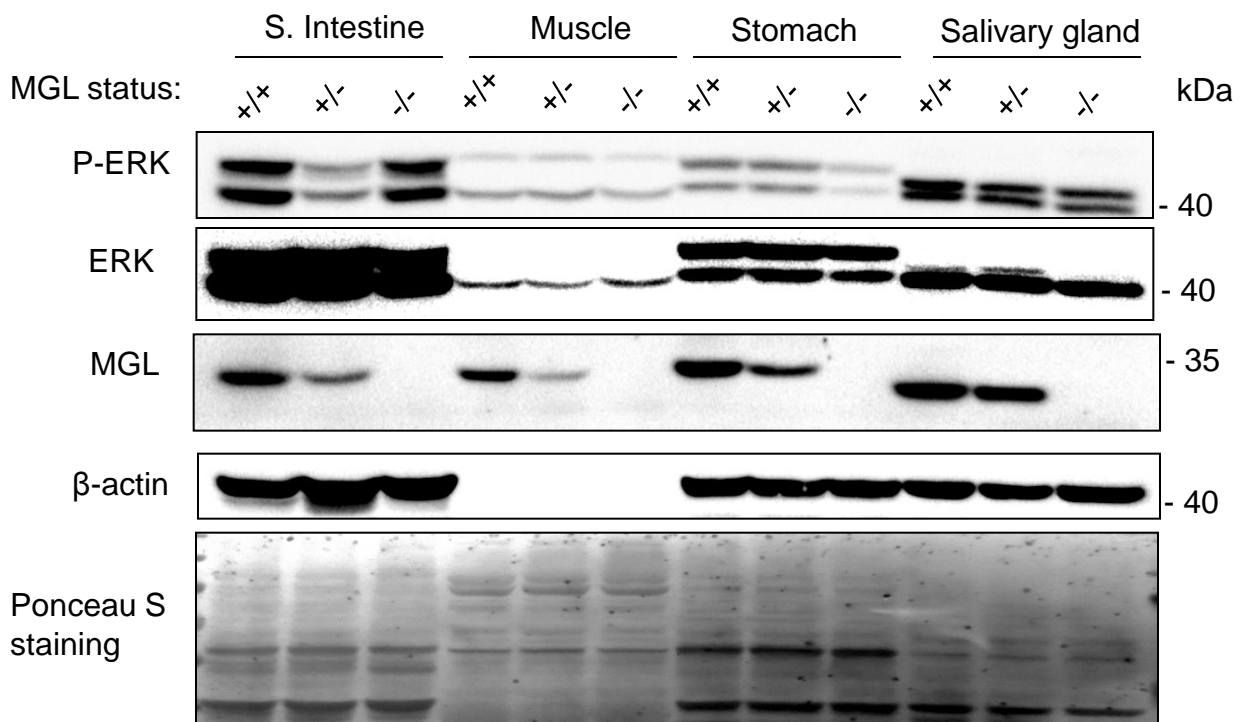

### Supplementary Figure 2

WB analysis of ERK, P-ERK in multiple mouse tissues. MGL status of each type of tissues are indicated. Both  $\beta$ -actin and Ponceau S staining serve as the loading controls.

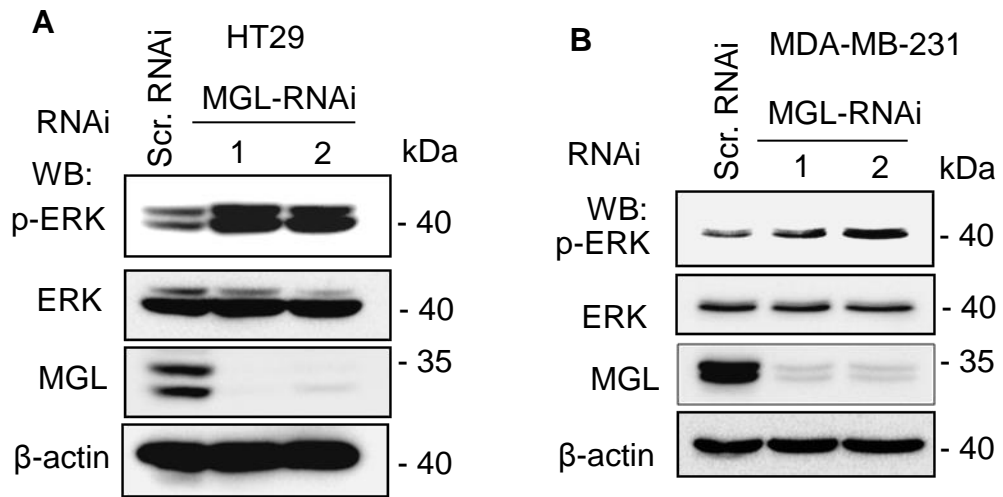

**Supplementary Fig. 3** MGL knockdown enhanced ERK phosphorylation in HT29 colon cancer cells (A) and MBA-MD-231 breast cancer cells (B). Two different MGL shRNAs (#1 and #2) were used for MGL knockdown.

Primers used for qRT-PCR analyses:

| Gene          | Primers                                                                                                | Sequences |
|---------------|--------------------------------------------------------------------------------------------------------|-----------|
| EGFR (human)  | forward primer: 5'-CGTGGCAAGTCCCCCAGTGA-3'<br>reverse primer: 5'-GCAGACCAGGCAGTCGCTCTC-3'              |           |
| EGFR (mouse)  | forward primer: 5'-AGGCACAAGTAACAGGCTCAC-3'<br>reverse primer: 5'-AAGGTCGTAATTCCTTT GCAC-3'            |           |
| COX-2 (human) | forward primer: 5'-CCTTCCTCCTGTGCCTGATG-3'<br>reverse primer: 5'-ACAATCTCATTGAATCAGGAAGCT-3'           |           |
| COX-2 (mouse) | forward primer: 5'-CAAGGGAGTCTGGAACATTG-3'<br>reverse primer: 5'-ACCCAGGTCCTCGCTTATGA-3'               |           |
| GAPDH (human) | forward primer: 5'-GAGTCAACGGATTTGGTCGT-3'<br>reverse primer: 5'-TTGATTTTGGAGGGATCT CG-3'              |           |
| GAPDH (mouse) | forward primer: 5'-CGACTTCAACAGCAACTCCCCTCTTCC-3'<br>reverse primer: 5'-TGGGTGGTCCAGGGTTTCTTACTCCTT-3' |           |

**Supplementary Table 1.** Clinicopathological features of primary lung cancer samples exhibiting altered expression of MGL at the mRNA levels.

| Patient No. | Age (yrs) | Sex    | Tumor Type                         | MGL Status |
|-------------|-----------|--------|------------------------------------|------------|
| 1           | 66        | Male   | Squamous cell carcinoma            | Decreased  |
| 2           | 69        | Female | Bronchiolo-alveolar adenocarcinoma | Increased  |
| 3           | 73        | Male   | Squamous cell carcinoma            | Decreased  |
| 4           | 65        | Male   | Squamous cell carcinoma            | Increased  |
| 5           | 64        | Male   | Squamous cell carcinoma            | Decreased  |
| 6           | 52        | Male   | Malignant carcinoid tumor          | Decreased  |
| 7           | 66        | Male   | Squamous cell carcinoma            | Decreased  |
| 8           | 57        | Male   | Squamous cell carcinoma            | Decreased  |
| 9           | 46        | Male   | Adenocarcinoma                     | Decreased  |
| 10          | 65        | Male   | Adenocarcinoma                     | Decreased  |
| 11          | 46        | Male   | Squamous cell carcinoma            | Increased  |
| 12          | 61        | Male   | Bronchiolo-alveolar adenocarcinoma | Decreased  |
| 13          | 65        | Female | Squamous cell carcinoma            | Decreased  |
| 14          | 62        | Male   | Adenocarcinoma                     | Increased  |
| 15          | 59        | Female | Adenocarcinoma                     | Decreased  |
| 16          | 44        | Female | Bronchiolo-alveolar adenocarcinoma | Decreased  |
| 17          | 75        | Male   | Squamous cell carcinoma            | Decreased  |
| 18          | 33        | Female | Malignant carcinoid tumor          | Decreased  |
| 19          | 62        | Male   | Adenocarcinoma                     | Decreased  |
| 20          | 60        | Male   | Squamous cell carcinoma            | Decreased  |
| 21          | 58        | Male   | Squamous cell carcinoma            | Decreased  |

This Table contains information reported in Study # 1 (ref. 6); the histological information on these samples was not reported in ref. 6; included here for overall evaluation of MGL expression in primary lung cancer.

**Supplementary Table 2.** Clinicopathological features of primary lung cancer samples exhibiting altered expression of MGL at the protein levels.

| Patient No. | Age (yrs) | Sex    | Tumor Type              | MGL Status |
|-------------|-----------|--------|-------------------------|------------|
| 1           | 72        | Female | Squamous cell carcinoma | Decreased  |
| 2           | 57        | Female | Adenocarcinoma          | Decreased  |
| 3           | 77        | Female | Adenocarcinoma          | Unchanged  |
| 4           | 64        | Male   | Squamous cell carcinoma | Decreased  |
| 5           | 77        | Male   | Adenocarcinoma          | Decreased  |
| 6           | 59        | Female | Squamous cell carcinoma | Decreased  |
| 7           | 72        | Male   | Squamous cell carcinoma | Unchanged  |
| 8           | 76        | Male   | Squamous cell carcinoma | Decreased  |
| 9           | 48        | Male   | Adenocarcinoma          | Increased  |
| 10          | 70        | Male   | Adenocarcinoma          | Increased  |
| 11          | 70        | Female | Squamous cell carcinoma | Unchanged  |
| 12          | 68        | Male   | Adenocarcinoma          | Decreased  |
| 13          | 68        | Male   | Squamous cell carcinoma | Decreased  |
| 14          | 76        | Male   | Squamous cell carcinoma | Decreased  |
| 15          | 80        | Female | Squamous cell carcinoma | Increased  |
| 16          | 66        | Male   | Squamous cell carcinoma | Decreased  |
| 17          | 60        | Male   | Adenocarcinoma          | Unchanged  |
| 18          | 78        | Male   | Squamous cell carcinoma | Unchanged  |
| 19          | 74        | Female | Adenocarcinoma          | Increased  |
| 20          | 68        | Male   | Adenocarcinoma          | Decreased  |
| 21          | 47        | Male   | Adenocarcinoma          | Decreased  |
| 22          | 63        | Male   | Adenocarcinoma          | Decreased  |
| 23          | 60        | Male   | Adenocarcinoma          | Decreased  |
| 24          | 66        | Female | Adenocarcinoma          | Unchanged  |
| 25          | 73        | Female | Squamous cell carcinoma | Decreased  |
| 26          | 53        | Male   | Adenocarcinoma          | Decreased  |
| 27          | 74        | Male   | Adenocarcinoma          | Increased  |
| 28          | 67        | Male   | Squamous cell carcinoma | Increased  |
| 29          | 75        | Female | Adenocarcinoma          | Decreased  |
| 30          | 68        | Male   | Adenocarcinoma          | Increased  |
| 31          | 54        | Male   | Adenocarcinoma          | Unchanged  |
| 32          | 76        | Male   | Adenocarcinoma          | Increased  |
| 33          | 57        | Female | Adenocarcinoma          | Decreased  |
| 34          | 75        | Female | Adenocarcinoma          | Decreased  |

Results reported in this Table represent Study # 2 i.e. present manuscript.
